# Supplementary material for: Whole exome sequencing in unexplained recurrent miscarriage families identified novel pathogenic genetic causes of euploid miscarriage
Source: PubMed Central journal article supplement — Hum Reprod. 2023 Mar 2;38(5):1003–18. doi: 10.1093/humrep/dead039 (PMC10152170; doi:10.1093/humrep/dead039), 2023-03-02
Supplement: dead039_supplementary_figure_s1.pdf [file dead039_supplementary_figure_s1.pdf]

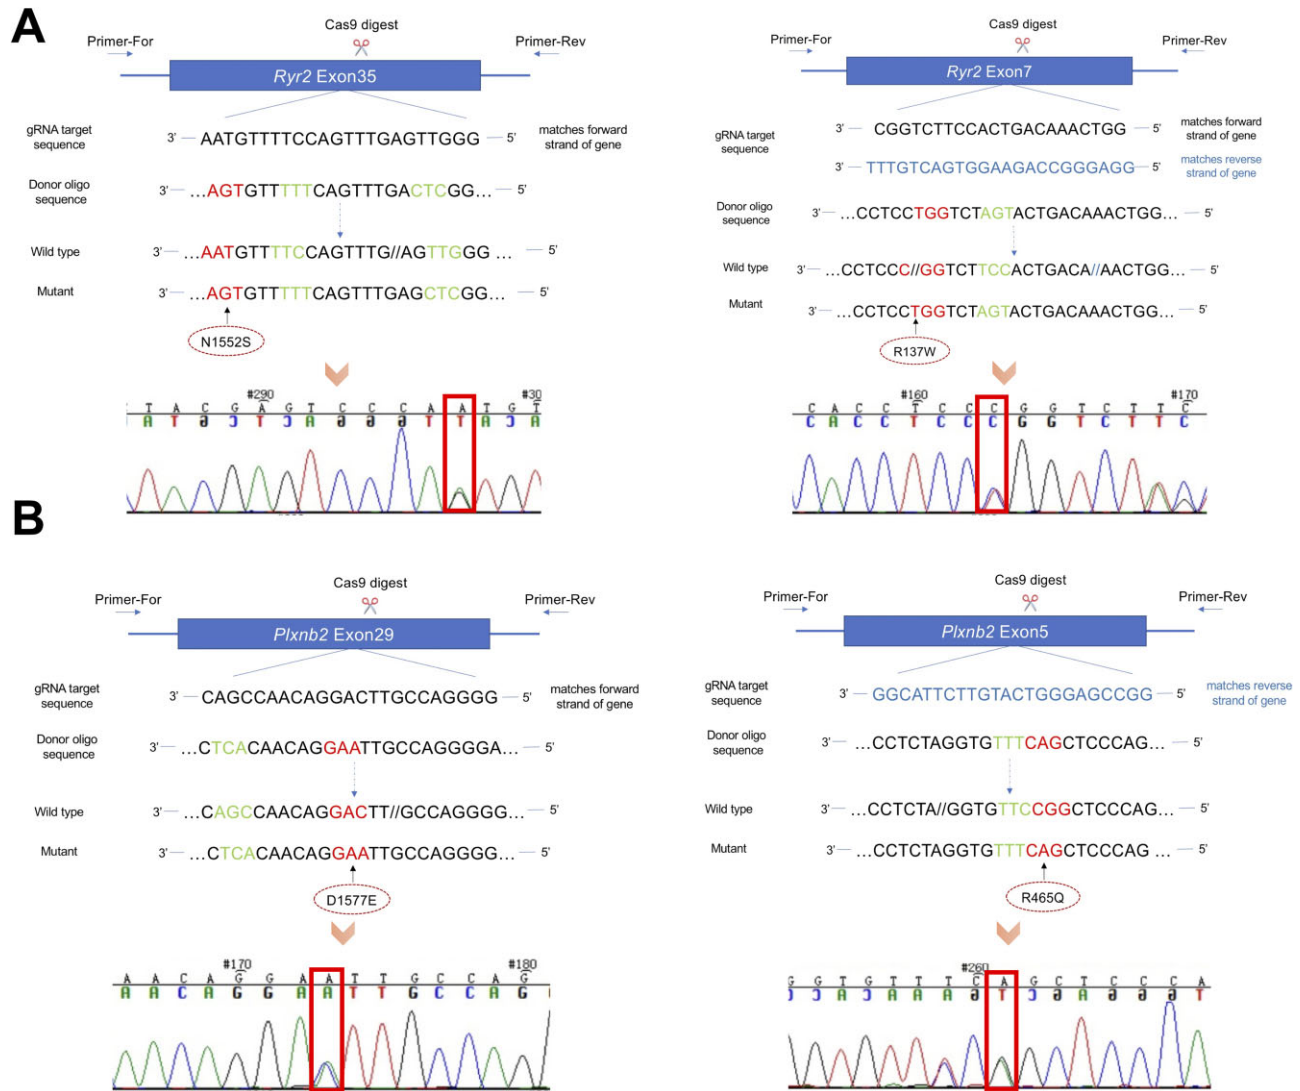

**Supplementary Figure S1. Generation of gene mutant mice and phenotypic characteristics of littermates with different genotypes. (A)** Generation of *Ryr2*<sup>N1552S/+</sup> and *Ryr2*<sup>R137W/+</sup> knock-in mice. **(B)** Generation of *Plxnb2*<sup>D1577E/+</sup> and *Plxnb2*<sup>R465Q/+</sup> knock-in mice.
