# Supplementary material for: Whole exome sequencing in unexplained recurrent miscarriage families identified novel pathogenic genetic causes of euploid miscarriage
Source: PubMed Central journal article supplement — Hum Reprod. 2023 Mar 2;38(5):1003–18. doi: 10.1093/humrep/dead039 (PMC10152170; doi:10.1093/humrep/dead039), 2023-03-02
Supplement: dead039_supplementary_figure_s2.pdf [file dead039_supplementary_figure_s2.pdf]

human reproduction SUPPLEMENTARY DATA

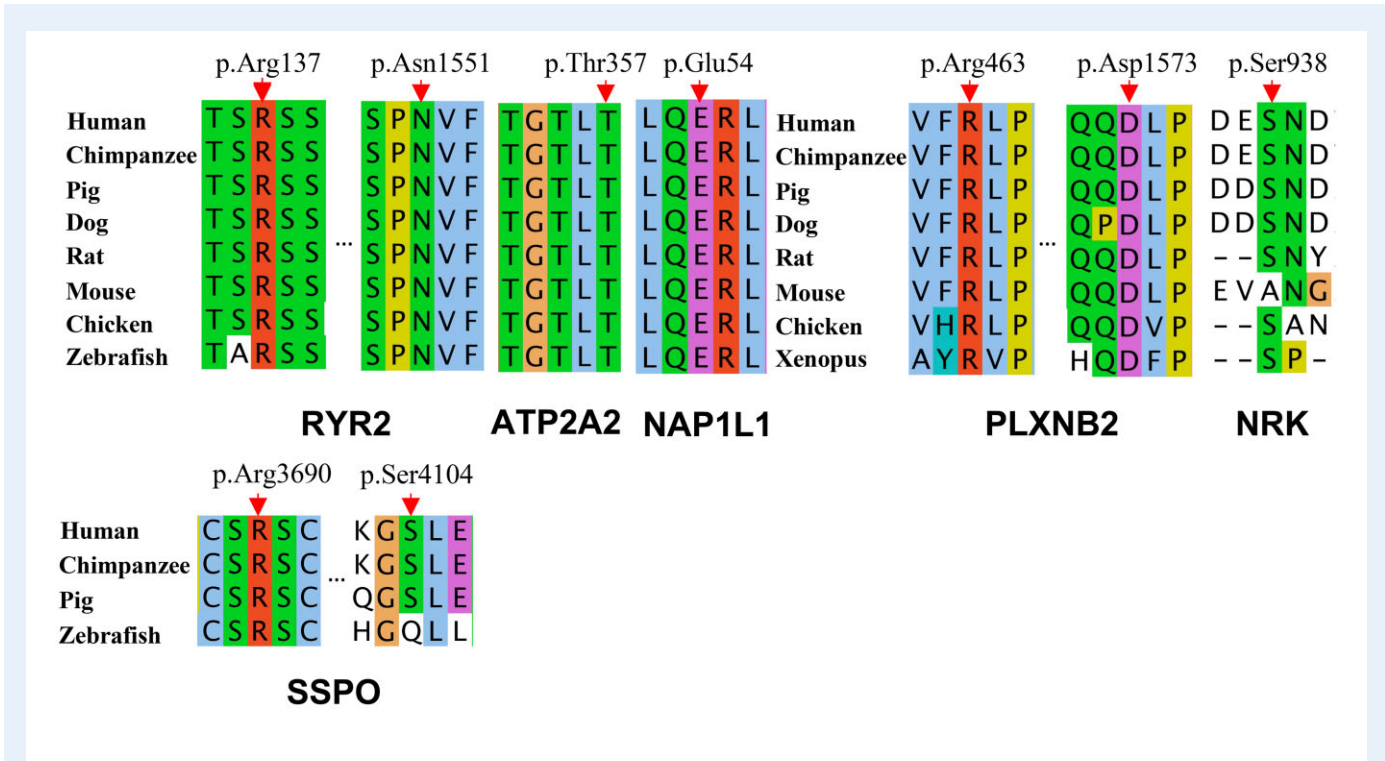

**Supplementary Figure S2. Conservation analysis of 6 putatively pathogenic genes.** Evolutionary conservation of variants in *PLXNB2* (p.D1573E and p.R463Q), *RYR2* (p.R137W and p.N1551S), *SSPO* (p.R3960H and p.S4104T), *ATP2A2* (p.T357I), *NAP1L1* (p.E54G), and *NRK* (p.S938P). The positions of variants are indicated by red arrows.
