# Supplementary material for: Whole exome sequencing in unexplained recurrent miscarriage families identified novel pathogenic genetic causes of euploid miscarriage
Source: PubMed Central journal article supplement — Hum Reprod. 2023 Mar 2;38(5):1003–18. doi: 10.1093/humrep/dead039 (PMC10152170; doi:10.1093/humrep/dead039), 2023-03-02
Supplement: dead039_supplementary_figure_s3.pdf [file dead039_supplementary_figure_s3.pdf]

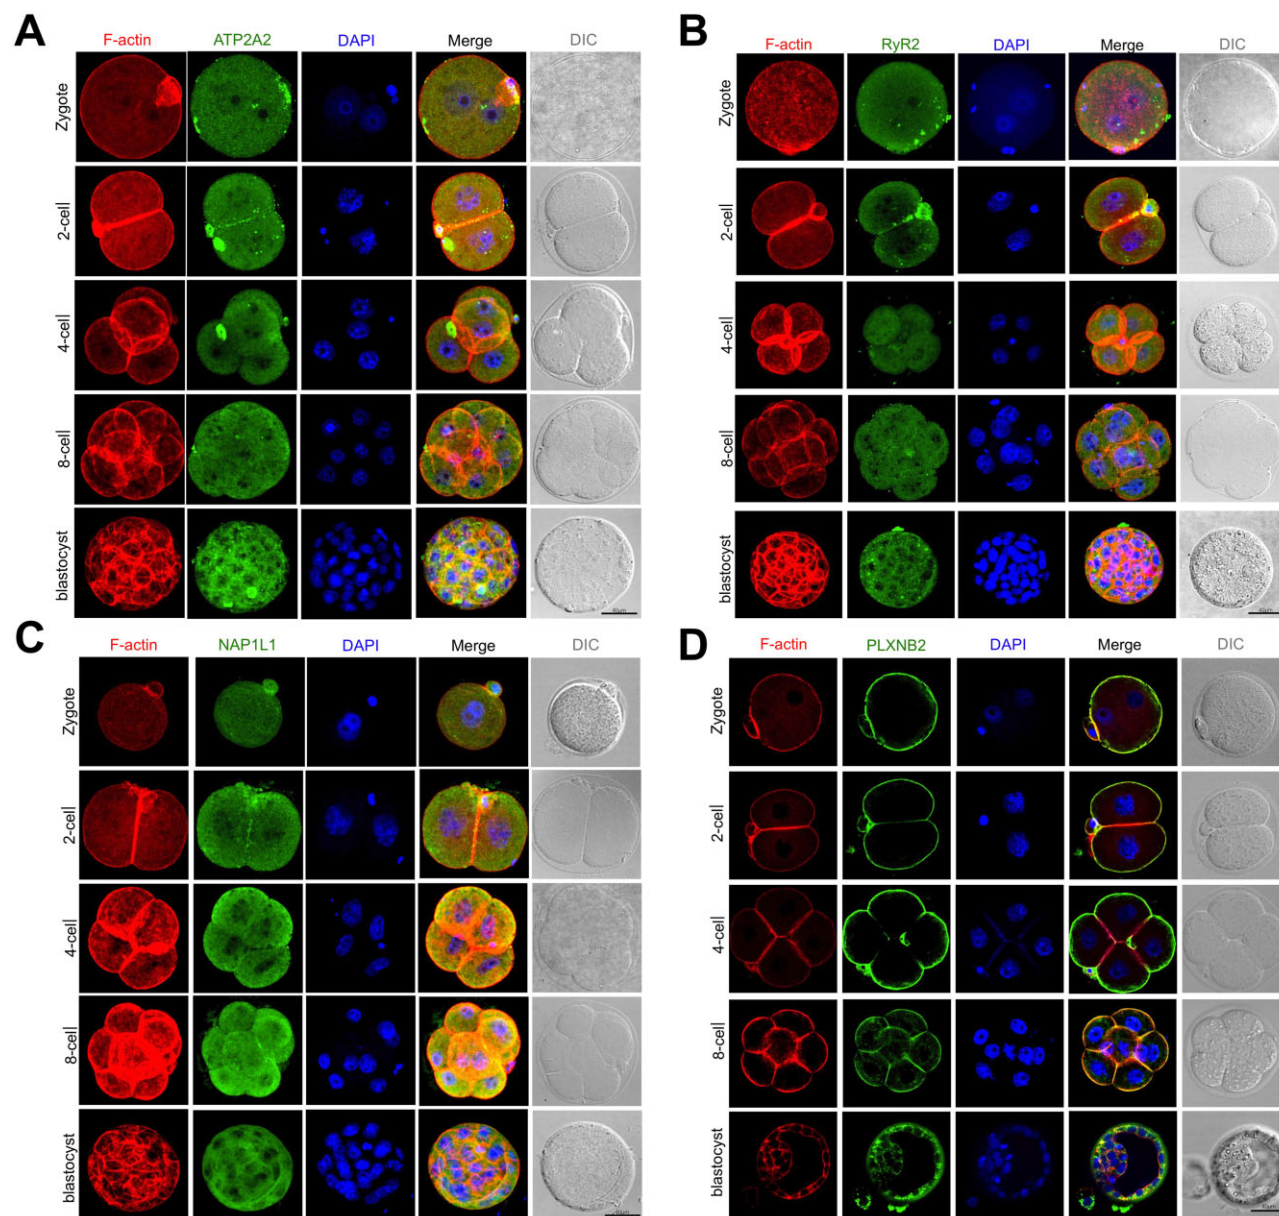

**Supplementary Figure S3. The spatiotemporal expression patterns of ATP2A2, RyR2, NAP1L1, and PLXNB2 during preimplantation embryonic development in mice. (A and B)** IF staining revealed the localization of RyR2 and ATP2A2 in the cytoplasm. **(C)** NAP1L1 was localized to the cytoplasm and had a weak signal in the nucleus. **(D)** PLXNB2 was localized to the cell membrane.
