# Supplementary material for: Whole exome sequencing in unexplained recurrent miscarriage families identified novel pathogenic genetic causes of euploid miscarriage
Source: PubMed Central journal article supplement — Hum Reprod. 2023 Mar 2;38(5):1003–18. doi: 10.1093/humrep/dead039 (PMC10152170; doi:10.1093/humrep/dead039), 2023-03-02
Supplement: dead039_supplementary_figure_s4.pdf [file dead039_supplementary_figure_s4.pdf]

human reproduction SUPPLEMENTARY DATA

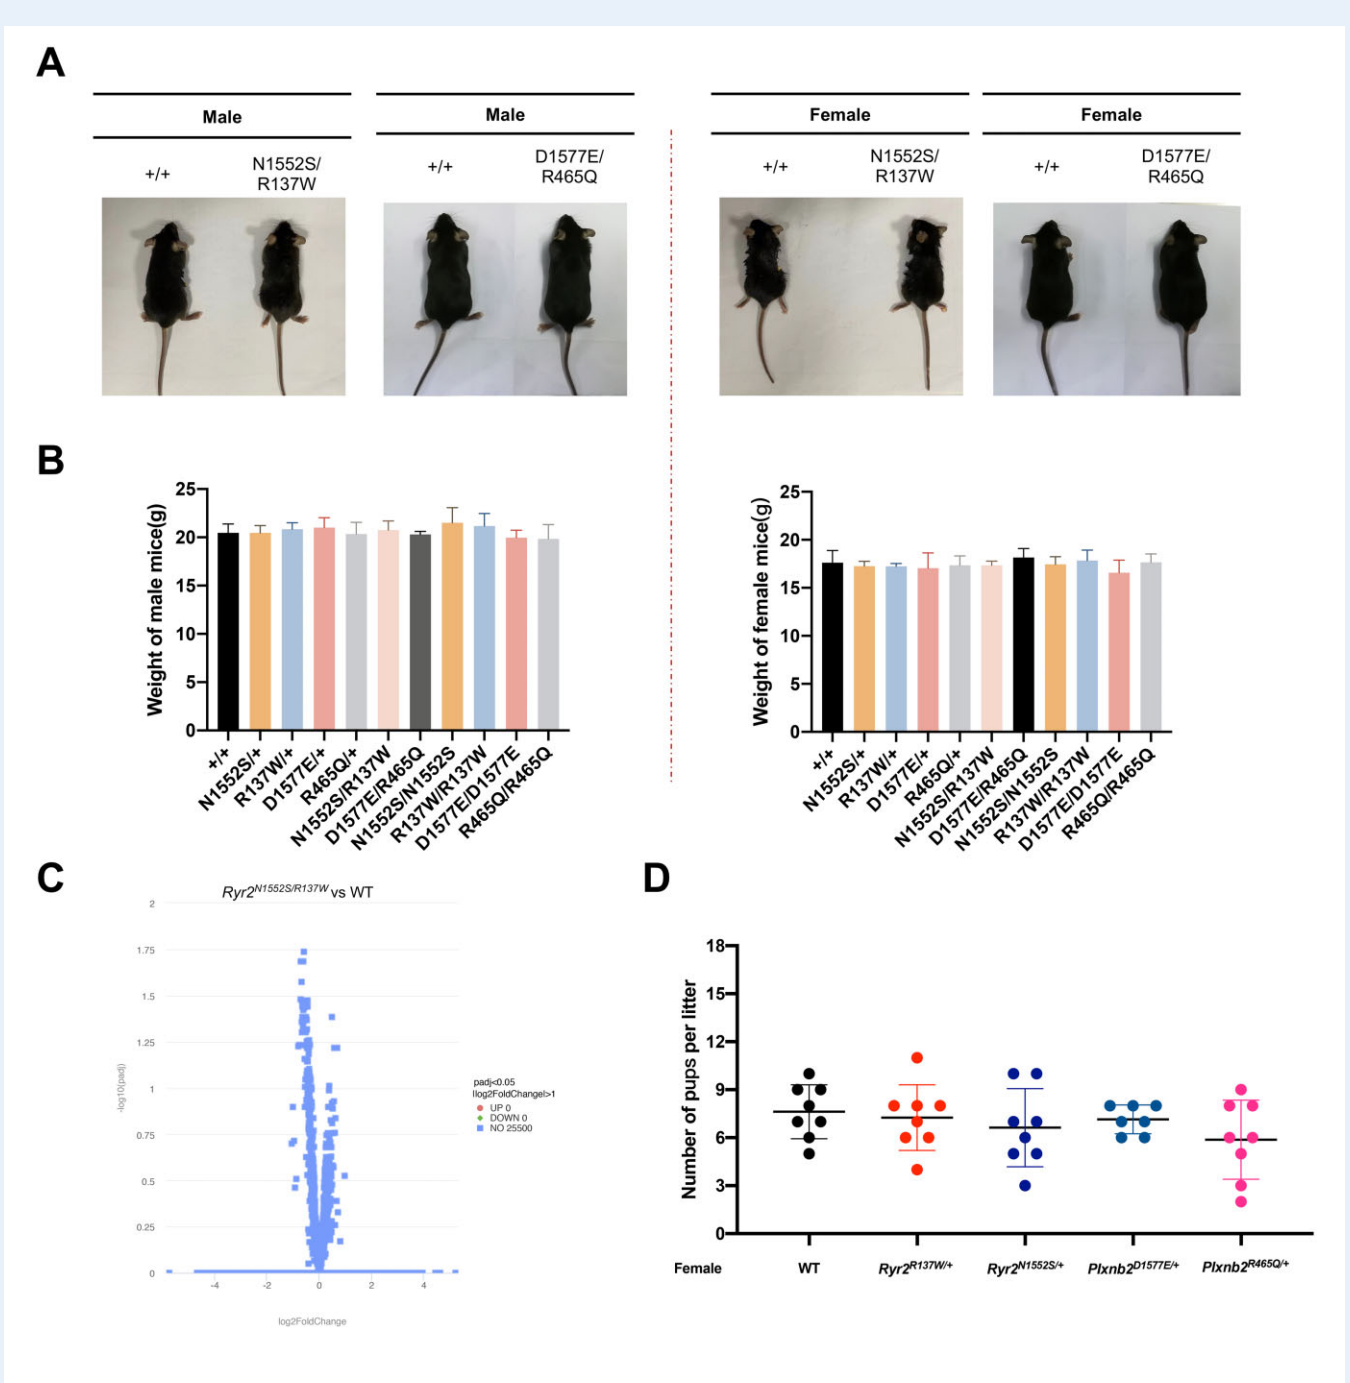

**Supplementary Figure S4. Generation of gene mutant mice and phenotypic characteristics of offspring with different genotypes.** (A) Images of male and female WT, *Ryr2*<sup>N1552S/R137W</sup> progeny, and *Plxnb2*<sup>D1577E/R465Q</sup> progeny. (B) Body weight comparison of different genotypes at 6 weeks postpartum (n = 13). (C) Volcano plots show DEGs of *Ryr2*<sup>N1552S/R137W</sup> vs WT mouse heart at 6 weeks postpartum (fold change ≥ 2 between genotypes for the DEGs, n = 4). (D) The litter sizes were derived from *Ryr2*<sup>N1552S/+</sup>, *Ryr2*<sup>R137W/+</sup>, *Plxnb2*<sup>D1577E/+</sup>, *Plxnb2*<sup>R465Q/+</sup>, and WT female mice at the age of 8 weeks old for 3 months. The results are shown as the mean ± SD, n = 4/group.
