# Supplementary material for: Whole exome sequencing in unexplained recurrent miscarriage families identified novel pathogenic genetic causes of euploid miscarriage
Source: PubMed Central journal article supplement — Hum Reprod. 2023 Mar 2;38(5):1003–18. doi: 10.1093/humrep/dead039 (PMC10152170; doi:10.1093/humrep/dead039), 2023-03-02
Supplement: dead039_supplementary_figure_s5.pdf [file dead039_supplementary_figure_s5.pdf]

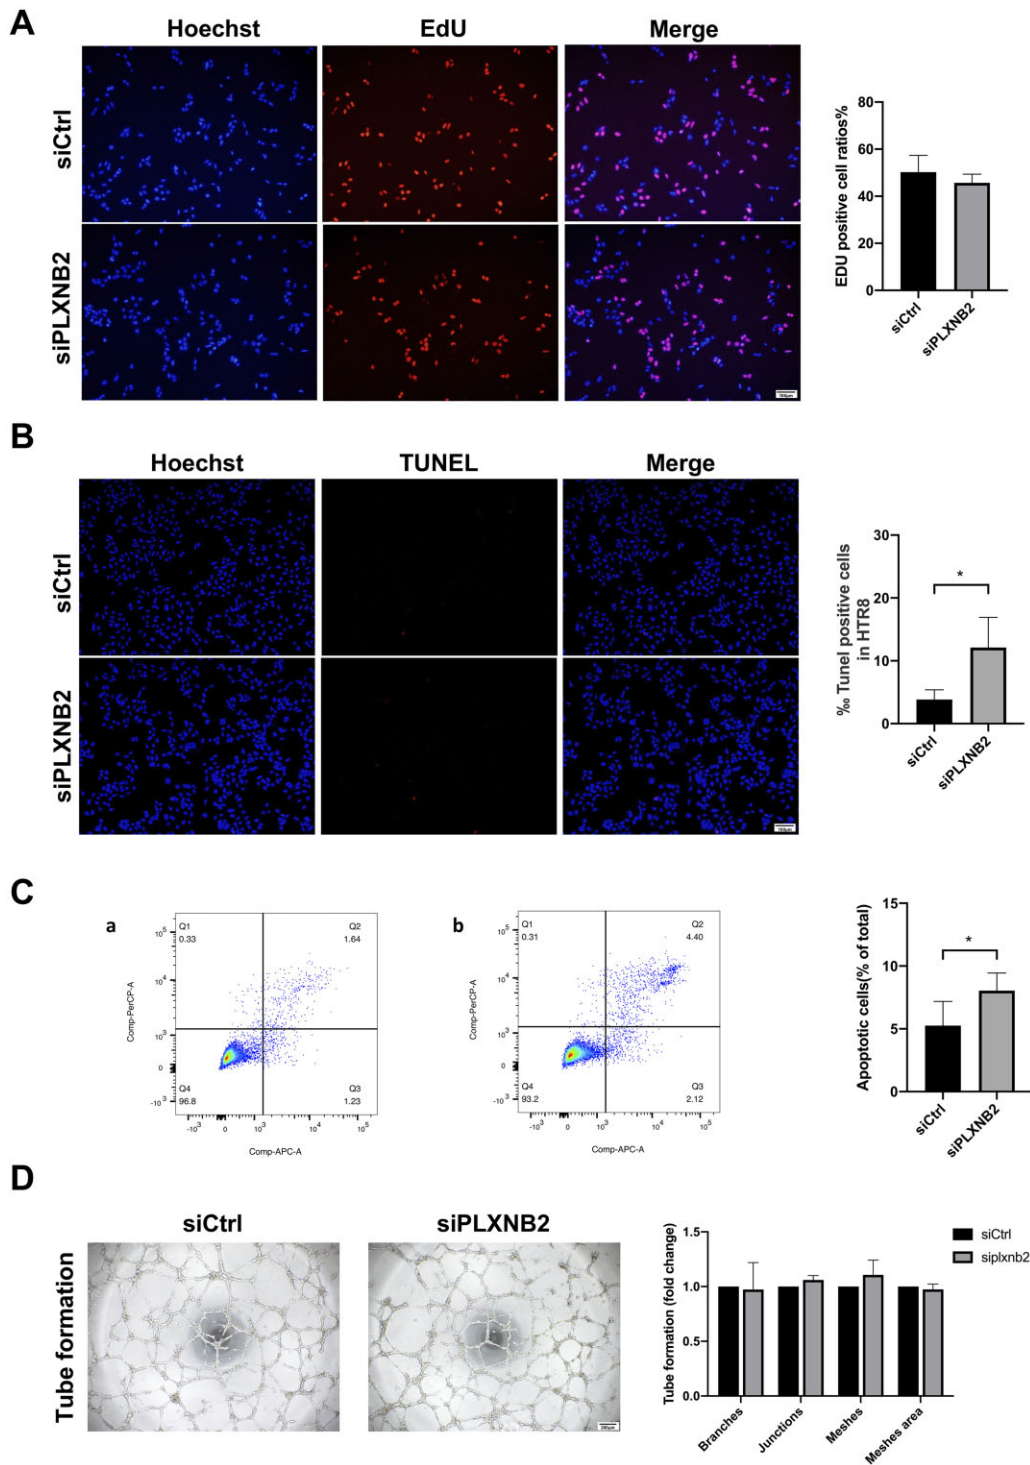

**Supplementary Figure S5. PLXNB2 knockdown did not influence HTR-8/SVneo cell proliferation or tube formation. (A)** IF images show the results of the EdU assay in HTR-8/SVneo cells with PLXNB2 knockdown. Cell proliferation was not influenced after siPLXNB2 transfection. Scale bars = 100  $\mu$ m. **(B)** IF images show TUNEL assays of HTR8/SVneo cells with PLXNB2 knockdown, and cells after transfection showed slightly accelerated apoptosis. Scale bars = 100 microns. **(C)** Apoptosis rates and quantified comparison of transfected HTR8/SVneo cells. **(D)** Representative images of the tube formation assay at 12 h. The tube formation ability was not influenced. Scale bars = 200  $\mu$ m. The results are shown as the mean  $\pm$  SD of at least three independent experiments. \* $P < 0.05$ .
