# Supplementary material for: Whole exome sequencing in unexplained recurrent miscarriage families identified novel pathogenic genetic causes of euploid miscarriage
Source: PubMed Central journal article supplement — Hum Reprod. 2023 Mar 2;38(5):1003–18. doi: 10.1093/humrep/dead039 (PMC10152170; doi:10.1093/humrep/dead039), 2023-03-02
Supplement: dead039_supplementary_figure_s6.pdf [file dead039_supplementary_figure_s6.pdf]

human reproduction SUPPLEMENTARY DATA

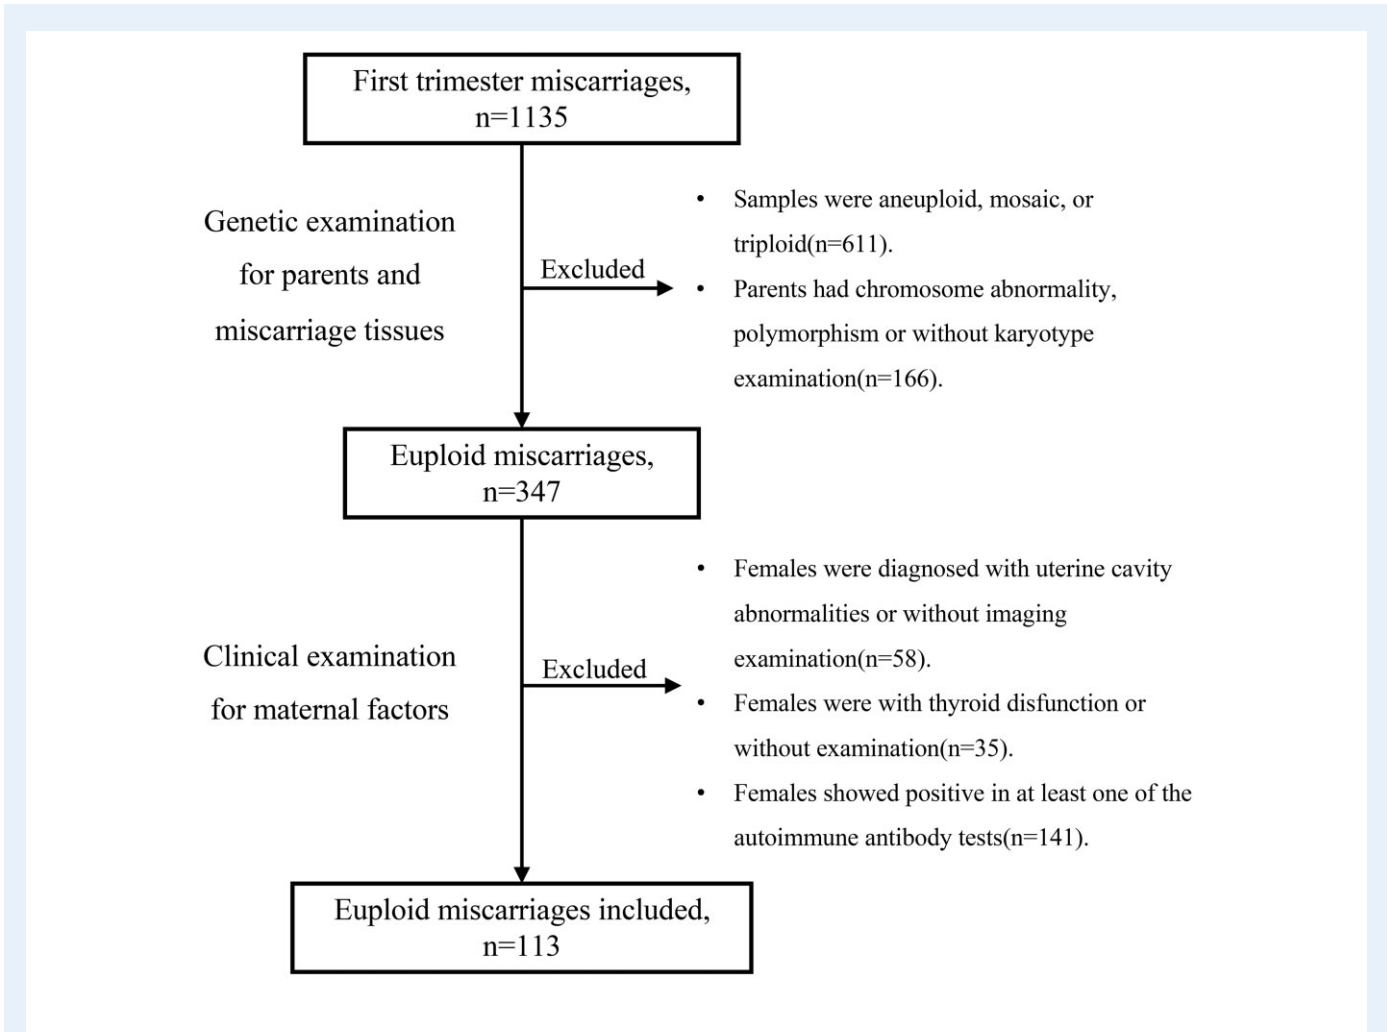

Supplementary Figure S6. Flowchart of euploid miscarriages included in multiplex PCR for *RYR2* and *PLXNB2* sequence.
