# Supplementary material for: Whole exome sequencing in unexplained recurrent miscarriage families identified novel pathogenic genetic causes of euploid miscarriage
Source: PubMed Central journal article supplement — Hum Reprod. 2023 Mar 2;38(5):1003–18. doi: 10.1093/humrep/dead039 (PMC10152170; doi:10.1093/humrep/dead039), 2023-03-02
Supplement: dead039_supplementary_table_sii.pdf [file dead039_supplementary_table_sii.pdf]

human reproduction SUPPLEMENTARY DATA

**Supplementary Table SII Primers for point mutant mice validation.**

| Genotype               | Forward primer sequence        | Reverse primer sequence        |
|------------------------|--------------------------------|--------------------------------|
| <i>Ryr2</i> p.N1552S   | 5'-TATGAGTCCAGGGTTATTGAACG-3'  | 5'-CTATAACTCCAGCACAGTAGGCAT-3' |
| <i>Ryr2</i> p.R137W    | 5'-GAACAAGTATATGGCTCAGGTAGA-3' | 5'-AGTATTCCGTGAACATCAGCAAG-3'  |
| <i>Plxnb2</i> p.D1577E | 5'-CATCAACACCCTGATGCACTACAA-3' | 5'-CCTTAGTCCGCTCTTCTCCTTC-3'   |
| <i>Plxnb2</i> p.R465Q  | 5'-TTCCCAAGGGTTTTATTTTGGGC-3'  | 5'-CATGTTCTGTGAAAGGCATCAGT-3'  |
