# Supplementary material for: Whole exome sequencing in unexplained recurrent miscarriage families identified novel pathogenic genetic causes of euploid miscarriage
Source: PubMed Central journal article supplement — Hum Reprod. 2023 Mar 2;38(5):1003–18. doi: 10.1093/humrep/dead039 (PMC10152170; doi:10.1093/humrep/dead039), 2023-03-02
Supplement: dead039_supplementary_table_siv.pdf [file dead039_supplementary_table_siv.pdf]

human reproduction SUPPLEMENTARY DATA

**Supplementary Table SIV Allele depth of *de novo* heterozygous mutations in Family 1 and Family 2.**

| Family   | Gene   | Amino acid Change | Sample | Allele depth (reference allele/alternative allele) |
|----------|--------|-------------------|--------|----------------------------------------------------|
| Family 1 | ATP2A2 | p.T357I           | Mother | 173C/1A                                            |
|          |        |                   | Father | 164C/1T                                            |
|          |        |                   | Villi  | 59C/41T                                            |
| Family 2 | NAPILI | p.E54G            | Mother | 138T/1C                                            |
|          |        |                   | Father | 200T/.                                             |
|          |        |                   | Villi  | 128T/43C                                           |
