# Supplementary material for: Whole exome sequencing in unexplained recurrent miscarriage families identified novel pathogenic genetic causes of euploid miscarriage
Source: PubMed Central journal article supplement — Hum Reprod. 2023 Mar 2;38(5):1003–18. doi: 10.1093/humrep/dead039 (PMC10152170; doi:10.1093/humrep/dead039), 2023-03-02
Supplement: dead039_supplementary_table_sv.pdf [file dead039_supplementary_table_sv.pdf]

**Supplementary Table SV** Carrying status of the *RYR2* and *PLXNB2* variants identified by whole exome sequencing in unexplained recurrent miscarriage tissues.

| Gene name     | Case ID   | Variant        | cDNA change | AAChange | Variant ID  | Nhet. | ExAC     | gnomAD   | SIFT | PPH2 | LRT | MutationTaster | CADD | GER  |
|---------------|-----------|----------------|-------------|----------|-------------|-------|----------|----------|------|------|-----|----------------|------|------|
| <i>RYR2</i>   | 79,42     | chr1:237765380 | c.A4652G    | p.N1551S | rs185237690 | 2/113 | 0.0045   | 0.0036   | T    | P    | D   | D              | 23.9 | 5.53 |
|               | .         | chr1:237538041 | c.409C>T    | p.R137W  | rs761916230 | 0/113 | 1.32E−04 | 5.58E−05 | D    | D    | D   | D              | 35   | 5.09 |
| <i>PLXNB2</i> | 66,93,113 | chr22:50726459 | c.G1388A    | p.R463Q  | rs192965378 | 3/113 | 0.0138   | 0.0107   | D    | P    | N   | D              | 24.1 | 2.98 |
|               | .         | chr22:50716877 | c.4719C>A   | p.D1573E |             | 0/113 |          |          | T    | P    | D   | D              | 24.2 | 1.17 |

AA, amino acid; B, Benign; D, deleterious; Nhet, number with heterozygous variant; P, possibly damaging; T, tolerated.
